# Supplementary material
Source: publisher figshare collection journal article supplement (https://frontiersin.figshare.com/ndownloader/files/38943593)
Supplement: Supplementary file [file 38943593]

Suppl. Figure 10

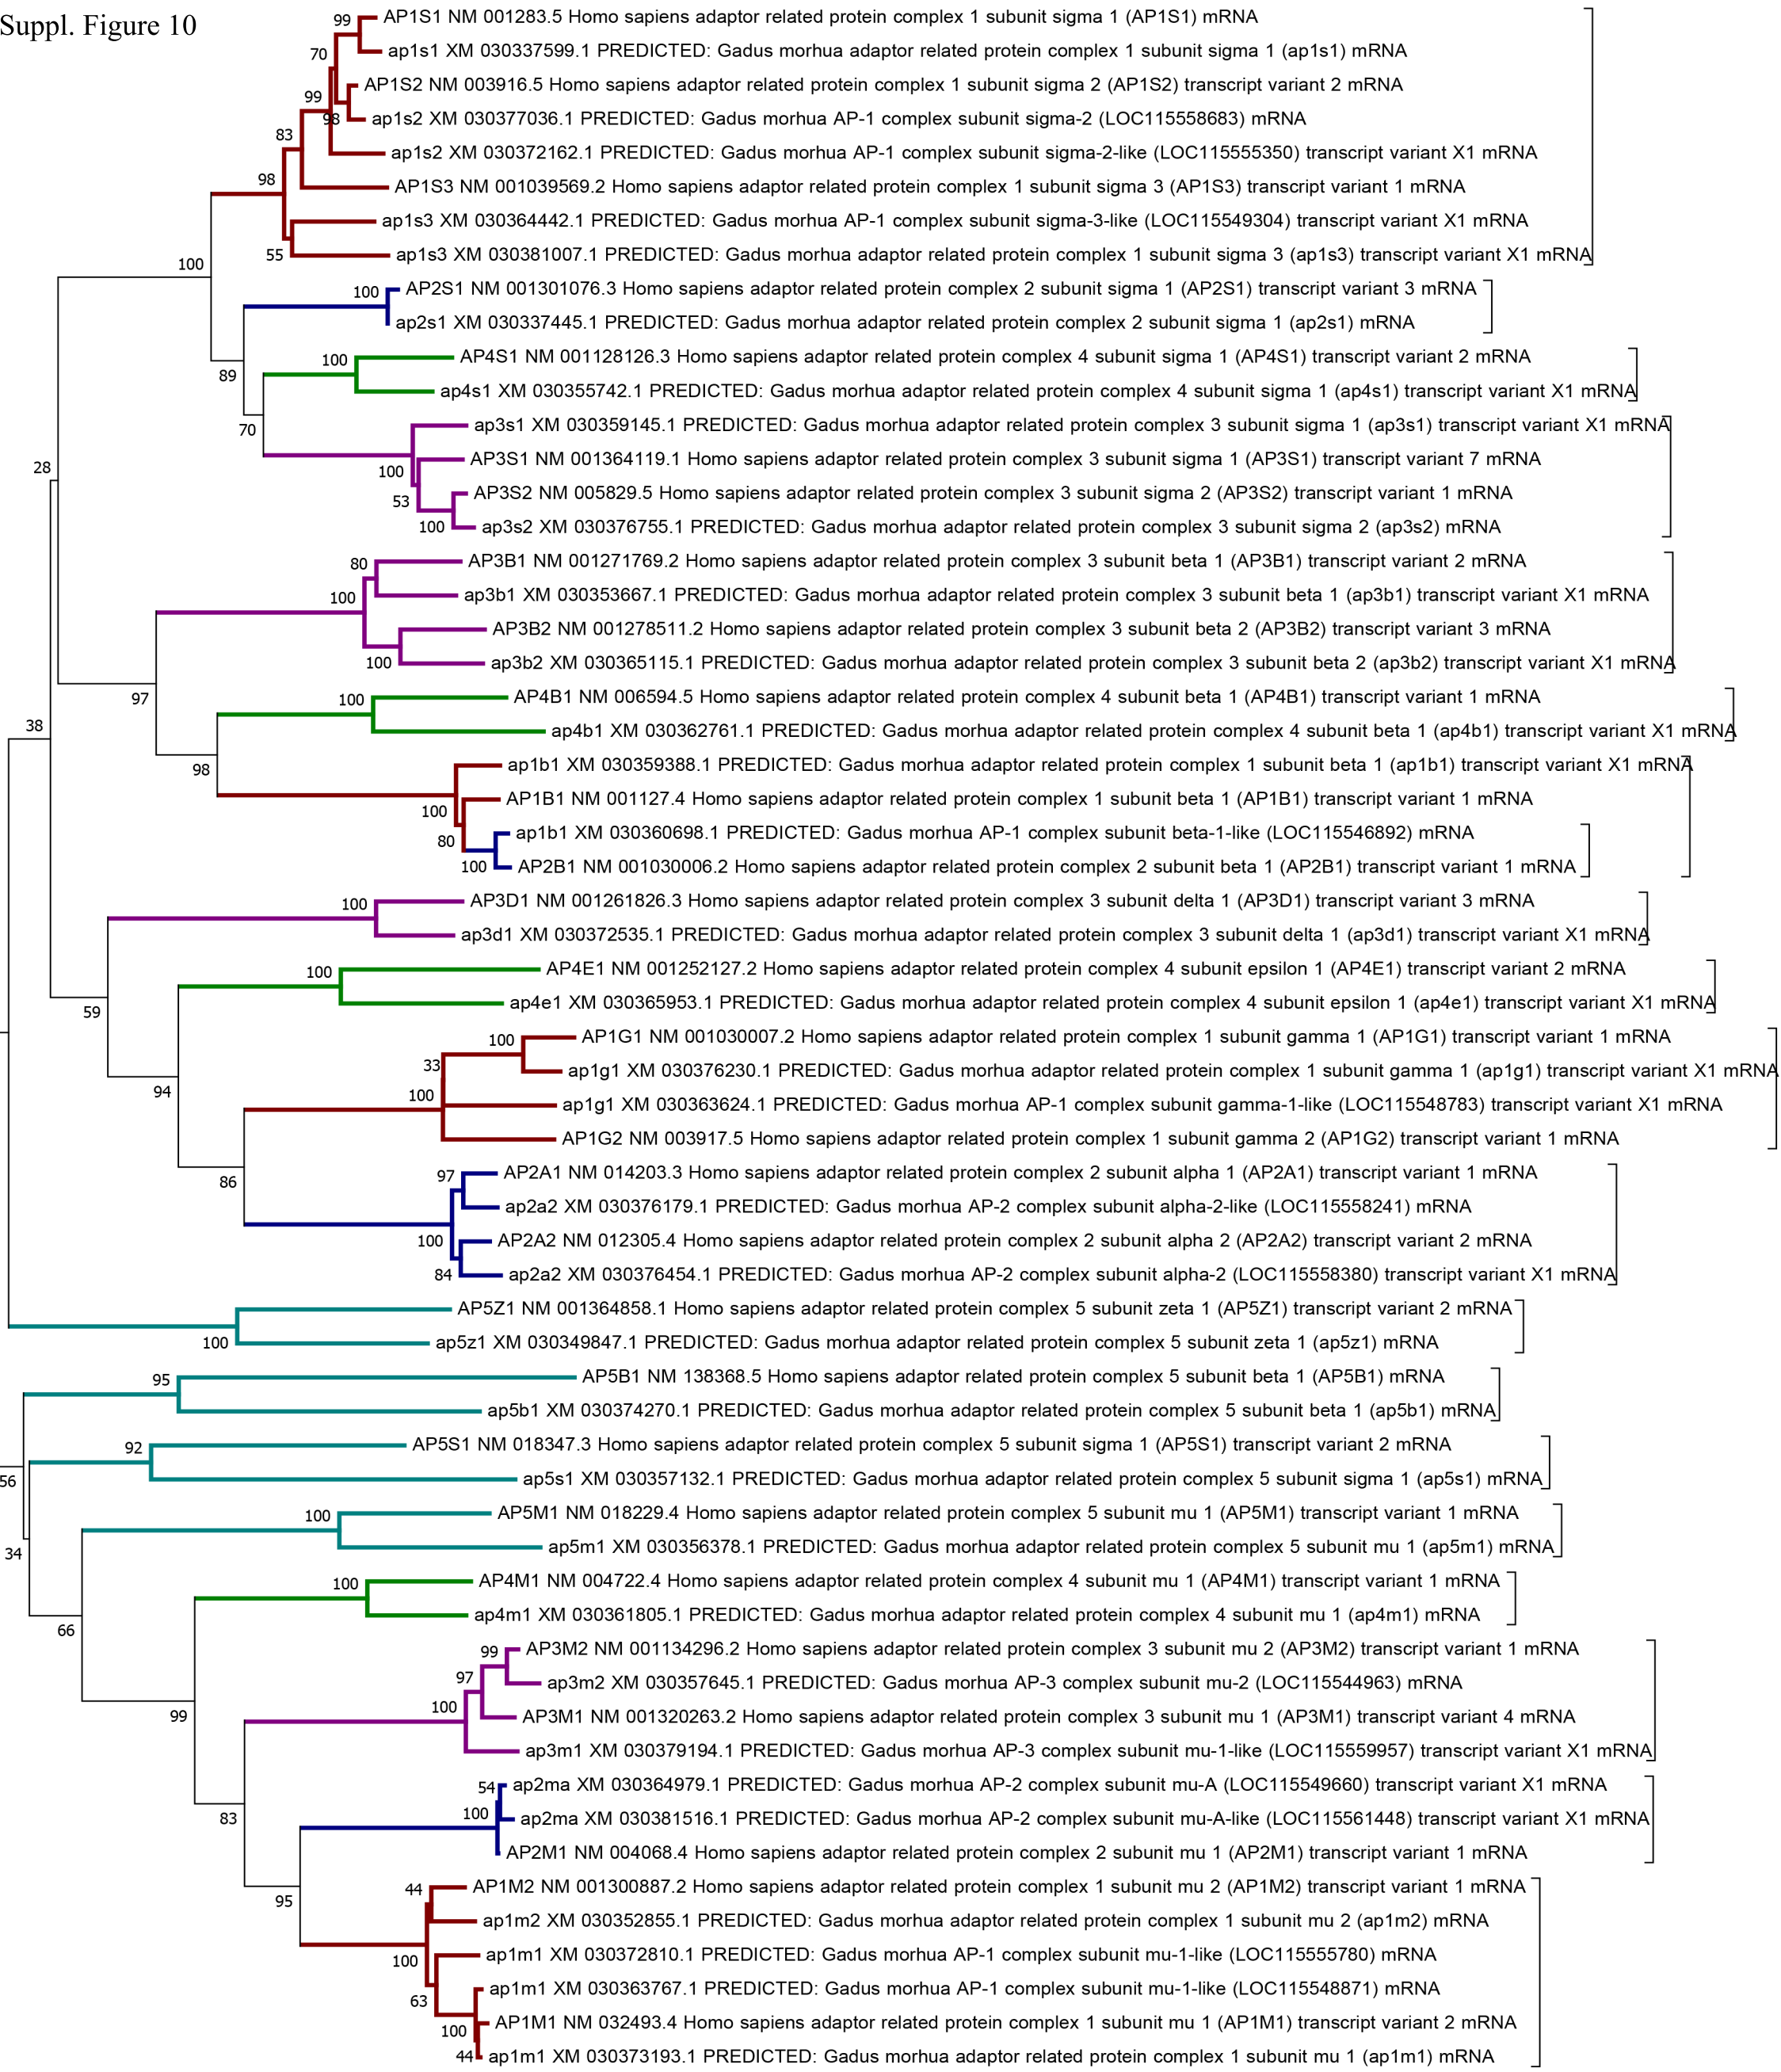

0,20
